# Supplementary material
Source: PubMed Central journal article supplement (PMC3515634)
Supplement: NIHMS414940-supplement-1_si_001.pdf [file NIHMS414940-supplement-1_si_001.pdf]

**Table 1.** Comparison of U-U mismatches

|                    |            | C1'-C1' | 1st<br>hbond | 2nd<br>hbond | $\lambda$ I | $\lambda$ II | Incline <sup>1</sup> | Shear | Stretch | Stagger | Buckle | Propeller | Opening | Type     |
|--------------------|------------|---------|--------------|--------------|-------------|--------------|----------------------|-------|---------|---------|--------|-----------|---------|----------|
| trCUG-3            | U2-U34     | 8.6     | 2.8          | 2.8          | 44.8        | 75.9         | minor                | -2.47 | -1.89   | 0.26    | -7.12  | -16.4     | 11.6    | Type I   |
|                    | U5-U31     | 10.6    | 2.7          | -            | 28.2        | 55.8         | minor                | -2.63 | -1.33   | -0.1    | 5.62   | -7.12     | -25.98  | Type II  |
| (CUG) <sub>6</sub> | U2-U17     | 10.3    | 2.7          | -            | 34.1        | 56.7         | minor                | -2.32 | -1.38   | -0.18   | 0.89   | -9.98     | -21.23  | Type II  |
|                    | U5-U14     | 10.6    | 3            | -            | 53.8        | 33.1         | major                | 2.27  | -1.17   | -0.36   | -6.03  | -15.03    | -22.06  | Type IV  |
|                    | U-8-U11    | 10.3    | 2.7          | -            | 32.4        | 56.9         | minor                | -2.5  | -1.48   | 0.45    | 2.36   | -11.27    | -21.02  | Type II  |
|                    | U11-U8     | 10      | 2.9          | -            | 57.8        | 40.4         | major                | 1.71  | -1.29   | -0.44   | -1.86  | -12.2     | -11.93  | Type IV  |
|                    | U14-U5     | 10.5    | 2.7          | -            | 55.9        | 32.4         | major                | 2.65  | -1.29   | -0.23   | 6.92   | -11.44    | -28.01  | Type IV  |
|                    | U17-U2     | 10.3    | 3            | -            | 58.2        | 39.2         | major                | 2.04  | -1.11   | -0.15   | -4.69  | -14.81    | -14.8   | Type IV  |
| Disney<br>NMR      | U5-U14 (0) | 10.7    | -            | -            | 71.2        | 32           | major                | 3.57  | -0.95   | -0.05   | -13.48 | -9.09     | -5.62   | Type VI  |
|                    | U5-U14 (1) | 10.6    | 2.9          | -            | 61.1        | 28.9         | major                | 3.03  | -1.14   | -0.09   | -22.07 | -6.46     | -24.3   | Type IV  |
|                    | U5-U14 (2) | 8.9     | 2.9          | 2.9          | 73.3        | 48.3         | major                | 2.24  | -1.74   | 0.02    | 12.56  | -17.25    | 4.58    | Type V   |
| Kiliszek<br>A-B    | U3-U6      | 10.7    | 2.8          | -            | 26.2        | 57.9         | minor                | -2.82 | -1.19   | -0.47   | 12.51  | -8.17     | -31.5   | Type II  |
|                    | U6-U3      | 10.3    | 2.9          | -            | 31.6        | 67.7         | minor                | -3.03 | -1.31   | -0.13   | 14.01  | -8.36     | -16.37  | Type II  |
| Kiliszek<br>C-D    | U3-U6      | 10.9    | 2.8          | -            | 56.1        | 22.6         | major                | 2.98  | -1.22   | -0.44   | -4.51  | -8.69     | -34.42  | Type IV  |
|                    | U6-U3      | 10.2    | 2.6          | -            | 59.2        | 32.4         | major                | 2.59  | -1.51   | -0.28   | 0.57   | -15.81    | -21.16  | Type IV  |
| Kiliszek<br>E-E*   | U3-U6      | 10.6    | 2.6          | -            | 52.7        | 29.1         | major                | 2.38  | -1.31   | -0.48   | -4.07  | -11.84    | -30.56  | Type IV  |
|                    | U6-U3      | 10.6    | 2.6          | -            | 29.1        | 52.7         | minor                | -2.38 | -1.31   | -0.48   | 4.07   | -11.84    | -30.56  | Type II  |
| Disney<br>3SYW     | U8-U14     | 8.8     | 3            | 3            | 46.3        | 72.4         | minor                | -2.2  | -1.7    | 0.21    | 0.27   | -14.34    | 10.06   | Type I   |
|                    | U11-U11    | 9.9     | -            | -            | 50.8        | 50.8         | none                 | 0.01  | -1.17   | 0.07    | 0.11   | -5.73     | -8.25   | Type III |
|                    | U14-U8     | 8.8     | 2.9          | 3            | 72.5        | 46.3         | major                | 2.2   | -1.71   | 0.21    | -0.76  | -14.31    | 10      | Type V   |
| Disney<br>3SZX     | U8-U14     | 10.5    | 2.7          | -            | 53.9        | 35.3         | major                | 1.85  | -1.16   | -0.11   | -5.24  | -8.68     | -29.19  | Type IV  |
|                    | U11-U11    | 10      | -            | -            | 46          | 53           | none                 | 0.14  | -0.99   | 0.18    | 1.98   | -10.74    | -0.21   | Type III |
|                    | U14-U8     | 10.5    | -            | -            | 58.8        | 48.1         | major                | 1.3   | -0.7    | -0.3    | -2.99  | -11.12    | -8.97   | Type VI  |

| Classification | # of   |         |        |
|----------------|--------|---------|--------|
|                | hbonds | Incline | Amount |
| Type I         | 2      | minor   | 2      |
| Type II        | 1      | minor   | 6      |
| Type III       | 0      | none    | 2      |
| Type IV        | 1      | major   | 9      |
| Type V         | 2      | major   | 2      |
| Type VI        | 0      | major   | 2      |

<sup>1</sup>Direction of incline was determined by considering the difference between  $\lambda$ I and  $\lambda$ II. If  $(\lambda$ I -  $\lambda$ II) < -8, then the pair was considered to be inclined toward the minor groove; however, if the difference was >8, the pair was considered to be inclined toward the major groove. Any values between -8 and 8 were considered to be not included.

**Table 2.** Comparison of CUG repeat helical parameters

|                           | Roll | Twist | Slide | Rise | Inclination | Helical twist | x-displacement | Helical rise | Zp    | Zp(h) |
|---------------------------|------|-------|-------|------|-------------|---------------|----------------|--------------|-------|-------|
| <b>B DNA</b> <sup>1</sup> | 0.60 | 36.00 | 0.23  | 3.32 | 2.10        | 36.50         | 0.05           | 3.29         | -0.36 | -0.02 |
| <b>A DNA</b> <sup>1</sup> | 8.00 | 31.10 | -1.53 | 3.31 | 14.70       | 32.50         | -4.17          | 2.83         | 2.24  | 4.19  |
| <b>(CUG)2</b>             | 9.17 | 33.48 | -1.34 | 3.10 | 18.57       | 35.89         | -4.70          | 2.39         | 2.35  | 4.62  |
| <b>(CUG)6</b>             | 9.16 | 32.77 | -1.90 | 3.25 | 16.98       | 34.54         | -5.08          | 2.49         | 2.69  | 4.81  |
| <b>A-B</b>                | 6.55 | 31.70 | -1.80 | 3.32 | 12.41       | 33.25         | -4.55          | 2.96         | 2.52  | 4.10  |
| <b>C-D</b>                | 8.56 | 33.11 | -1.59 | 3.30 | 6.93        | 34.78         | -4.58          | 2.66         | 2.40  | 4.57  |
| <b>E-E*</b>               | 6.78 | 32.77 | -1.90 | 3.32 | 14.12       | 34.05         | -5.03          | 2.69         | 2.52  | 4.32  |
| <b>3SYW</b>               | 8.51 | 28.68 | -1.73 | 3.16 | 18.76       | 30.62         | -5.27          | 2.39         | 2.27  | 4.64  |
| <b>3SZX</b>               | 8.63 | 32.33 | -1.64 | 3.21 | 14.93       | 33.55         | -4.26          | 2.71         | 2.52  | 4.46  |

<sup>1</sup>A and B-form structural parameters from: Lu, X.-J., & Olson, W. K. (2003). 3DNA: a software package for the analysis, rebuilding and visualization of three-dimensional nucleic acid structures. *Nucleic acids research*, 31(17), 5108–5121.
