# Supplementary material
Source: PubMed Central journal article supplement (PMC3515634)
Supplement: NIHMS414940-supplement-4_si_004.pdf [file NIHMS414940-supplement-4_si_004.pdf]

**Supplemental Figure 1.** Alignment of trCUG-3 with two different GAAA tetraloop/receptor structures. (A) Structure of trCUG-3 and a symmetry mate used for comparison to other tetraloop/receptor structures. Magnesium ions are numbered. (B) Alignment of the tetraloop/receptor of trCUG-3 (blue) with that of 1GID (orange). The first three magnesium ions are near the cobalt hexamine ion found in 1GID. The fourth magnesium ion near the receptor is near a corresponding magnesium ion in 1GID. (C) Alignment of the tetraloop/receptor of trCUG-3 (blue) with that of 1HR2 (orange). Again, the first three magnesium ions in trCUG-3 are near a magnesium ion found in 1HR2. The second, third and fourth magnesium ions also have counterparts near the receptor.

**Supplemental Figure 2.** Graphical representation of the average overlap of the bases in the 5'CUG/3'GUC motif. An illustration of the base stacking of all the available CU/UG base steps can be found in Figure 3. Average overlap was calculated using 3DNA from all currently available 5'CUG/3'GUC motifs (17-19, 37). Any base step involving a non-canonical U-U pair (CU/UG and UG/CU) shows very little overlap while the GC/GC base steps stack have significant overlap. Error bars are standard deviation.
