# Supplementary material
Source: PubMed Central journal article supplement (PMC3515634)

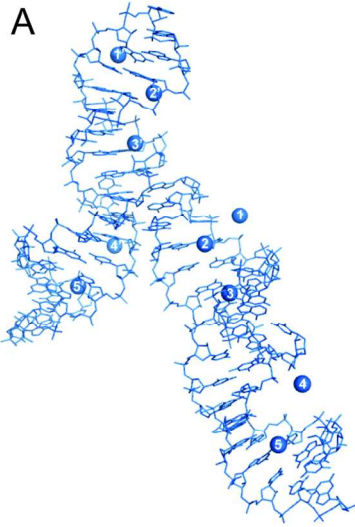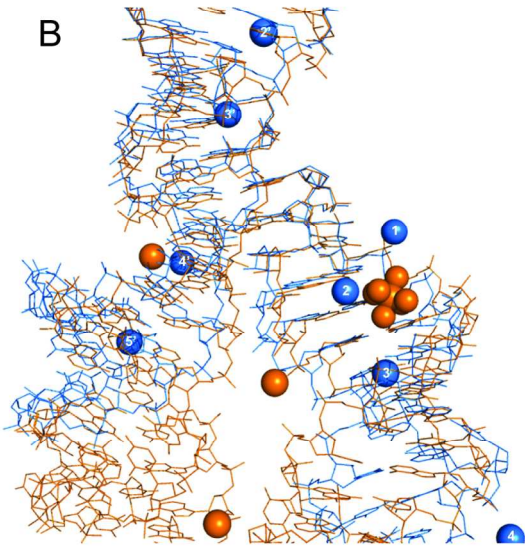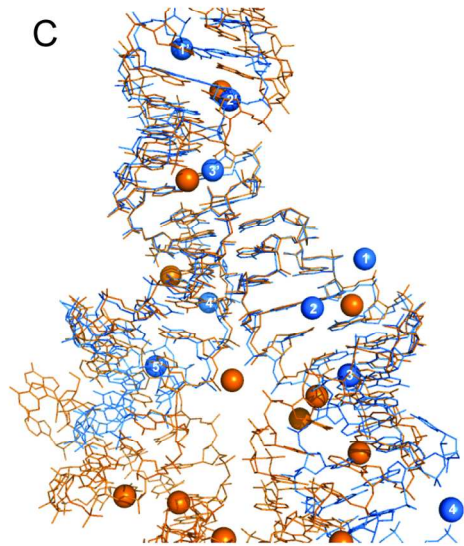

145x156mm (300 x 300 DPI)

Supplement: NIHMS414940-supplement-2_si_002.pdf [file NIHMS414940-supplement-2_si_002.pdf]
